# Supplementary material for: Genetic diversity and population structure of six Chinese indigenous pig breeds in the Taihu Lake region revealed by sequencing data
Source: PubMed Central journal article supplement — Anim Genet. 2015 Sep 16;46(6):697–701. doi: 10.1111/age.12349 (PMC5049631; doi:10.1111/age.12349), 2015-09-16

**Figure S1** Extent of LD (predicated as  $r^2$ ) within and across the six breeds. MMS, Middle Meishan; SWT, Shawutou; EHL, Erhualian; M, Mi; FJ, Fengjing; JXB, Jiaxing Black; SMS, Small Meishan.  $r^2$  predicated as described by Ai et al., 2013.

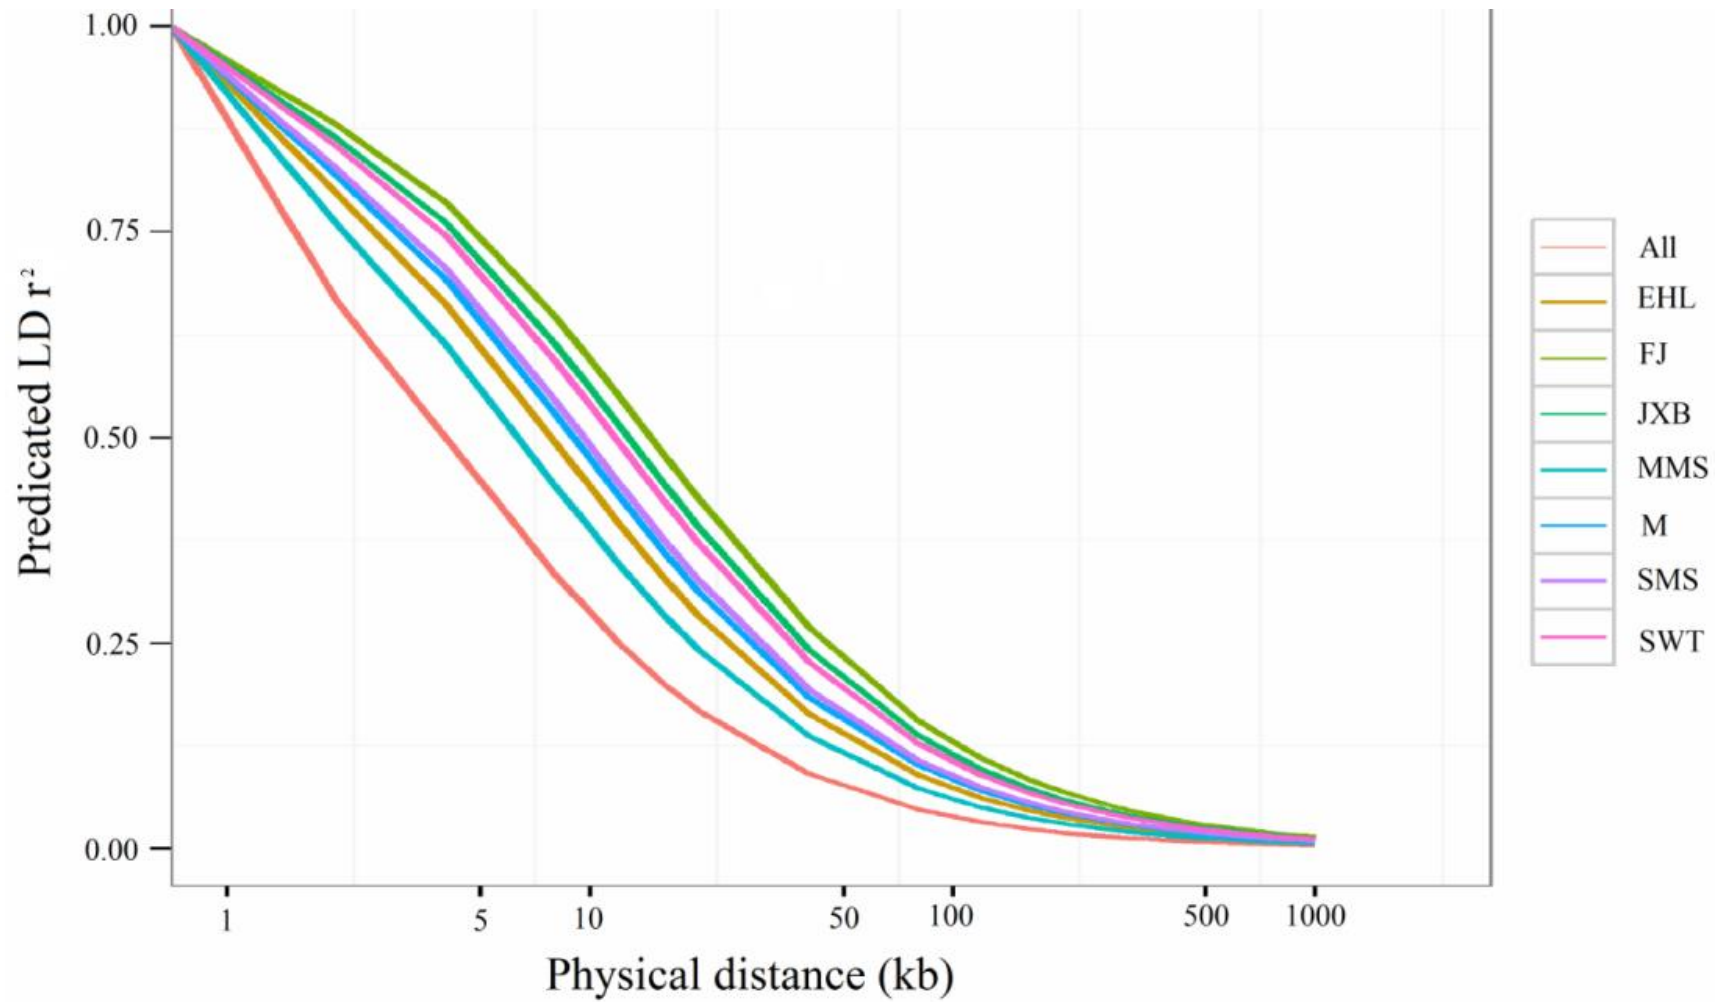

Supplement: AGE-46-697-s001.pdf [file AGE-46-697-s001.pdf]
