# Supplementary material for: Genetic diversity and population structure of six Chinese indigenous pig breeds in the Taihu Lake region revealed by sequencing data
Source: PubMed Central journal article supplement — Anim Genet. 2015 Sep 16;46(6):697–701. doi: 10.1111/age.12349 (PMC5049631; doi:10.1111/age.12349), 2015-09-16

**Figure S2** The neighbor-joining tree of the pigs from the six breeds based on the genome-wide SNPs. MMS, Middle Meishan; SWT, Shawutou; EHL, Erhualian; M, Mi; FJ, Fengjing; JXB, Jiaxing Black; SMS, Small Meishan.

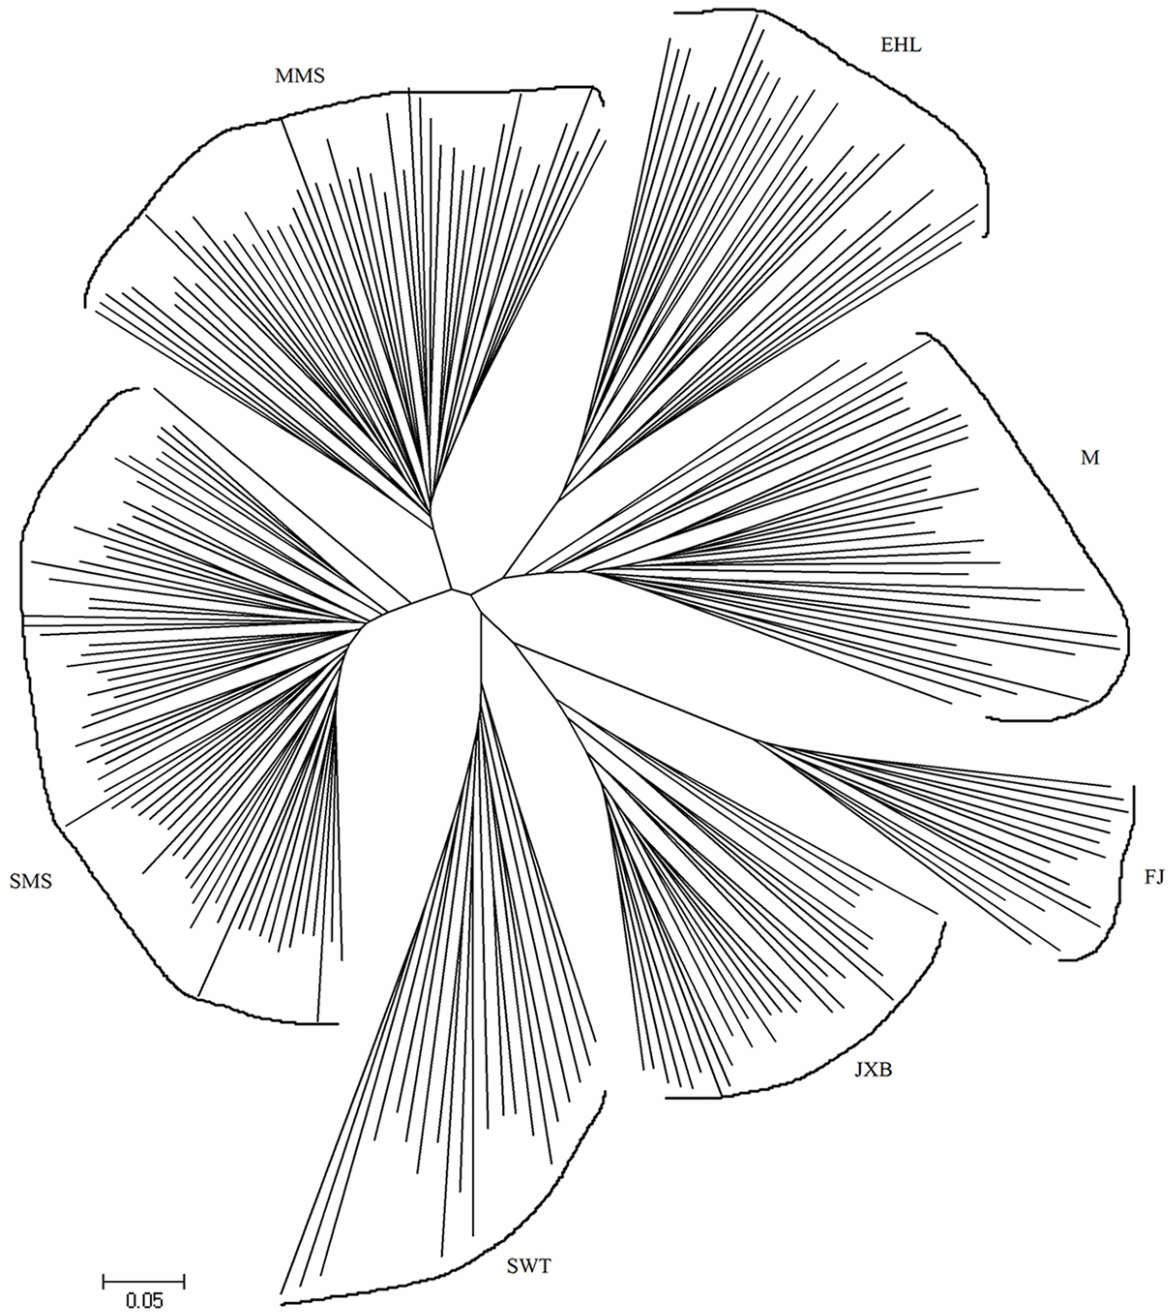

Supplement: AGE-46-697-s002.pdf [file AGE-46-697-s002.pdf]
