# Supplementary material for: Genetic diversity and population structure of six Chinese indigenous pig breeds in the Taihu Lake region revealed by sequencing data
Source: PubMed Central journal article supplement — Anim Genet. 2015 Sep 16;46(6):697–701. doi: 10.1111/age.12349 (PMC5049631; doi:10.1111/age.12349), 2015-09-16
Supplement: AGE-46-697-s004.pdf [file AGE-46-697-s004.pdf]

**Table S1** Genetic differentiation ( $F_{ST}$  values) between the seven pig populations.

|     | MMS   | SWT   | EHL          | M     | FJ           | JXB   |
|-----|-------|-------|--------------|-------|--------------|-------|
| MMS |       |       |              |       |              |       |
| SWT | 0.093 |       |              |       |              |       |
| EHL | 0.097 | 0.087 |              |       |              |       |
| M   | 0.098 | 0.093 | <b>0.061</b> |       |              |       |
| FJ  | 0.135 | 0.112 | 0.118        | 0.128 |              |       |
| JXB | 0.116 | 0.108 | 0.107        | 0.111 | 0.128        |       |
| SMS | 0.081 | 0.115 | 0.112        | 0.101 | <b>0.160</b> | 0.130 |

Note: MMS, Middle Meishan; SWT, Shawutou; EHL, Erhualian; M, Mi; FJ, Fengjing; JXB, Jiaxing Black; SMS, Small Meishan.
